# Supplementary material for: Biological Relevance of Free Radicals in the Process of Physiological Capacitation and Cryocapacitation
Source: MDPI journal article supplement (doi:10.3390/oxygen2020014), 2022-05-27
Supplement: s1 [file s1]

Archive with 1 entries (1 files):
- oxygen-1734130-supplementary.pdf
